# Supplementary material
Source: publisher figshare collection journal article supplement (https://tandf.figshare.com/ndownloader/files/22153995)
Supplement: Supplementary file 1 [file 22153995]

## Supplementary Materials

### Spatial and temporal variability of open biomass burning in Northeast China from 2003 to 2017

Lili WANG<sup>a</sup>, Xin JIN<sup>a,b</sup>, Qinglu WANG<sup>a,b</sup>, Huiqin MAO<sup>c</sup>, Qiyang LIU<sup>d</sup>, Guoqing WENG<sup>c</sup>, Yuesi WANG<sup>a,b</sup>

<sup>a</sup>State Key Laboratory of Atmospheric Boundary Layer Physics and Atmospheric Chemistry, Institute of Atmospheric Physics, Chinese Academy of Sciences, Beijing 100029, China;

<sup>2</sup>University of Chinese Academy of Sciences, Beijing 100049, China; <sup>3</sup>Satellite Environment Center, Ministry of Ecology and Environment of the People's Republic of China, Beijing, 100094, China; <sup>4</sup>East China Normal University, Shanghai 200241, China

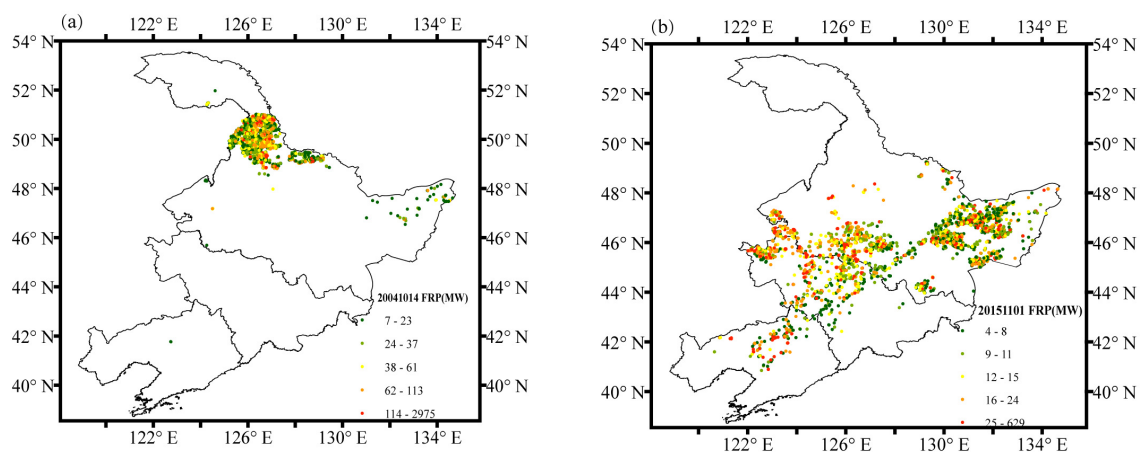

**Figure S1.** Distributions of FRP (fire radiative power) on (a) 14 October 2004 and (b) 1 November 2015 in Northeast China.
